# Supplementary material for: The structure of N,N′-bis(2-hydroxyethyl)ethane-1,2-diamine and its complexes with Zn(ii) and Cd(ii)
Source: Royal Society of Chemistry journal article supplement (doi:10.1039/b909843g), 2009-01-01
Supplement: b909843g.pdf [file b909843g.pdf]

## **The structure of *N,N'*-bis(2-hydroxyethyl)ethane-1,2-diamine and its complexes with Zn(II) and Cd(II)**

Alvaro S. de Sousa\*<sup>a</sup>, Sandra A. Reisinger<sup>a</sup>, Manuel A. Fernandes<sup>a</sup>,  
Christopher B. Perry<sup>a</sup>, Pradeep R. Varadwaj<sup>b</sup> and Helder M. Marques\*<sup>a</sup>

<sup>a</sup>*Molecular Sciences Institute, School of Chemistry, University of the Witwatersrand, Private Bag 3, Wits 2050, Johannesburg, 2050 South Africa.*

<sup>b</sup>*Department of Chemistry, Okayama University, Okayama City, Japan*

### **Supplementary Information**

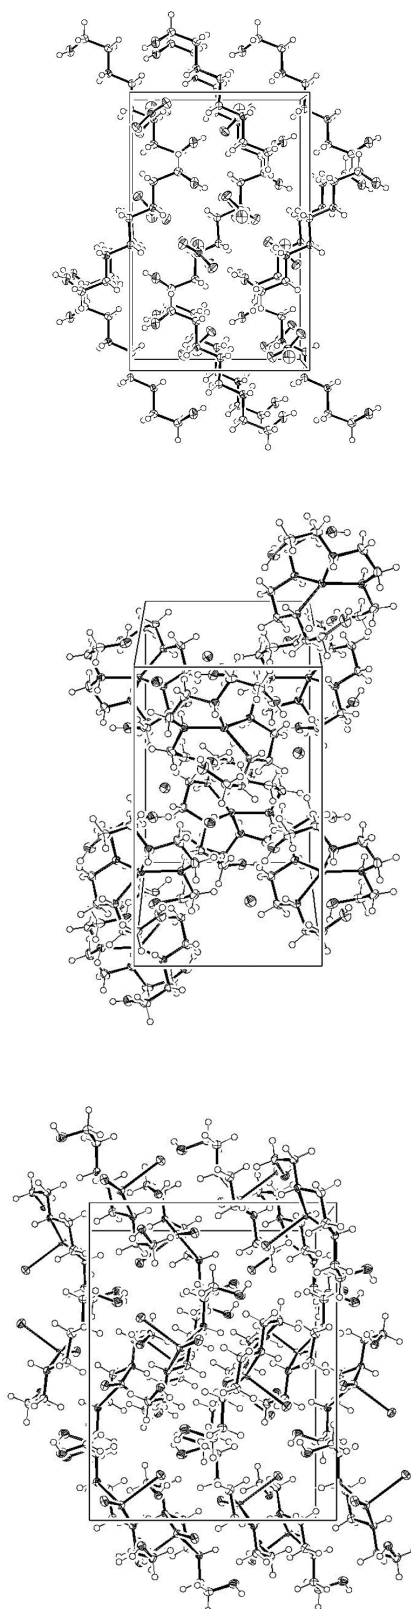

**Figure S1.** ORTEP-3 diagrams of the unit cell (viewed along the (1 0 0) direction), from the top, of  $(\text{H}_2\text{BHEEN})(\text{NO}_3)_2$ ,  $[\text{Zn}(\text{BHEEN})_2]\text{Cl}_2$  and  $[(\mu\text{-Cl})_2(\text{Cd}(\text{BHEEN})\text{Cl}_2)]$ .

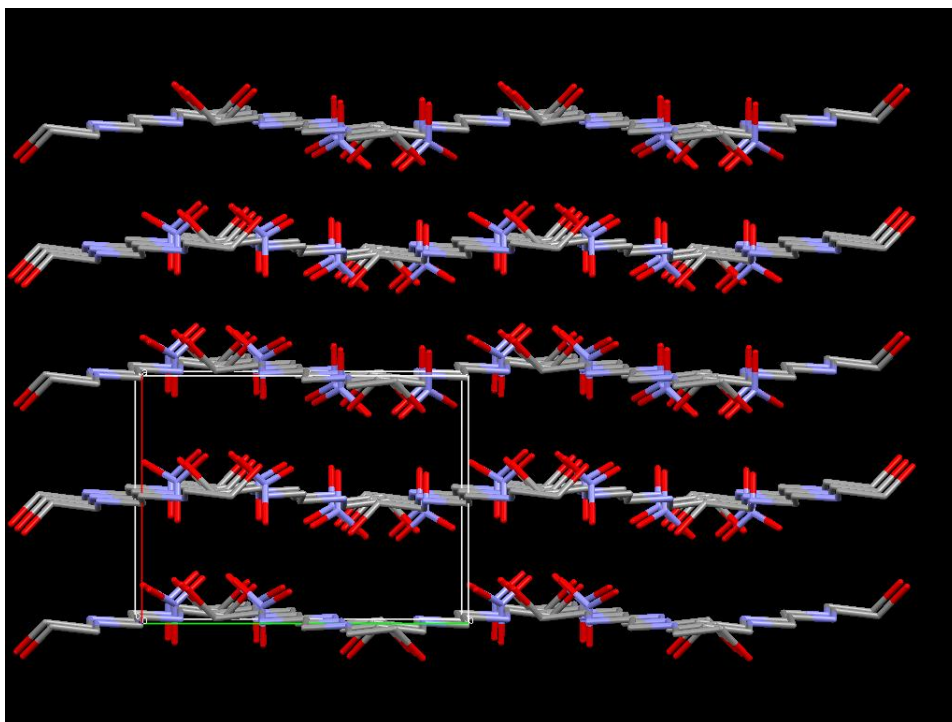

**Figure S2.** The layered packing of (H<sub>2</sub>BHEEN)(NO<sub>3</sub>)<sub>2</sub> viewed (slightly offset, and with H atoms omitted for clarity) along the crystallographic *c* axis.

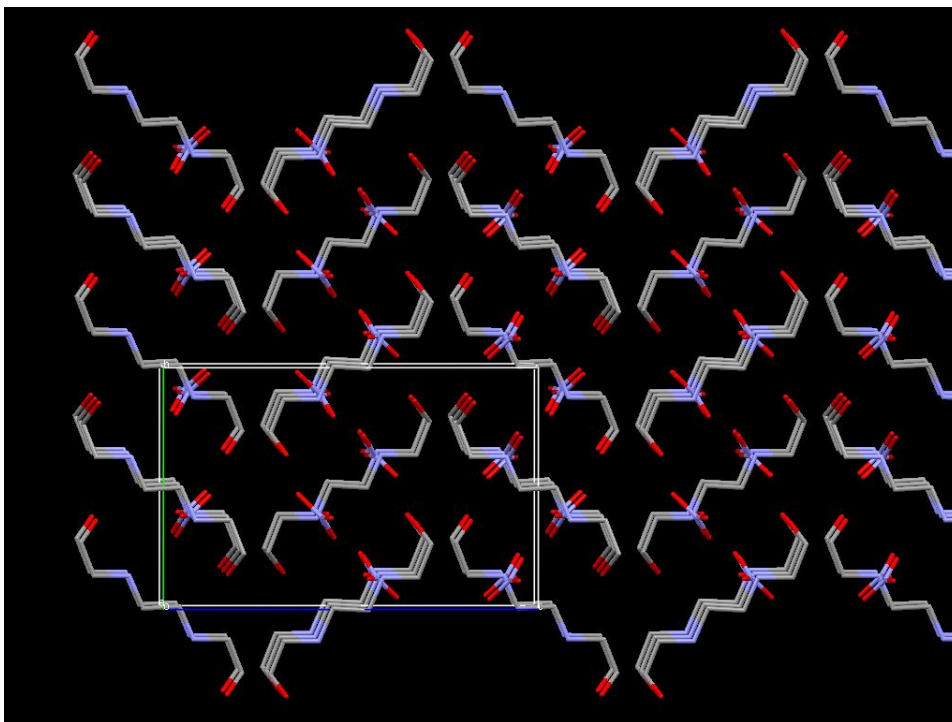

**Figure S3.** The herring-bone packing of (H<sub>2</sub>BHEEN)(NO<sub>3</sub>)<sub>2</sub> viewed (slightly offset) along the crystallographic *a* axis.

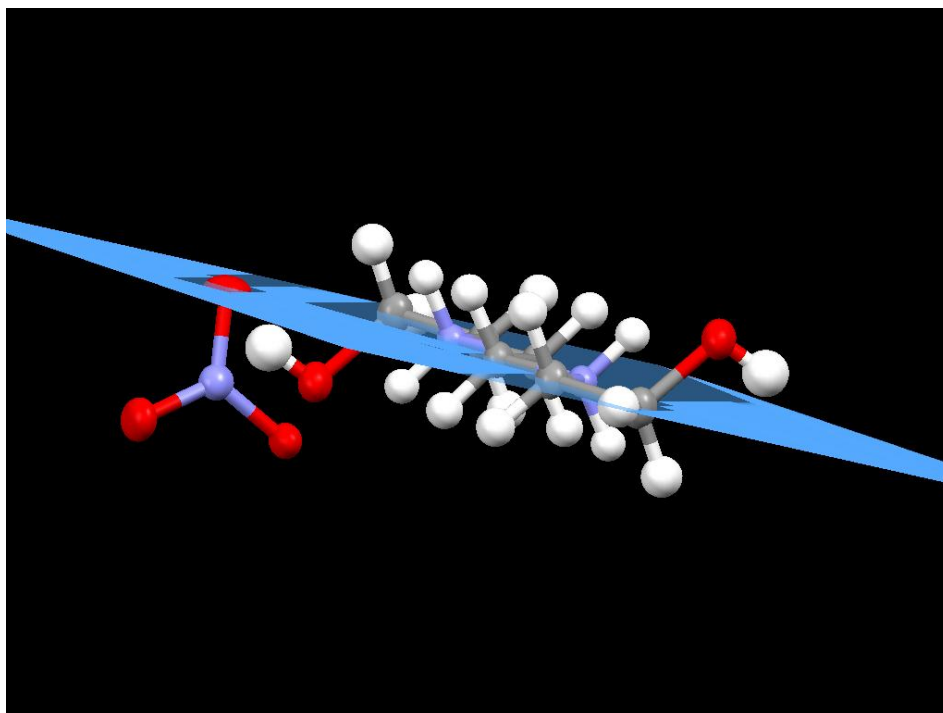

**Figure S4.** The C and N atoms of  $(\text{H}_2\text{DHEEN})^{2+}$  lie along a plane with the two hydroxyl groups above and below the plane, respectively.

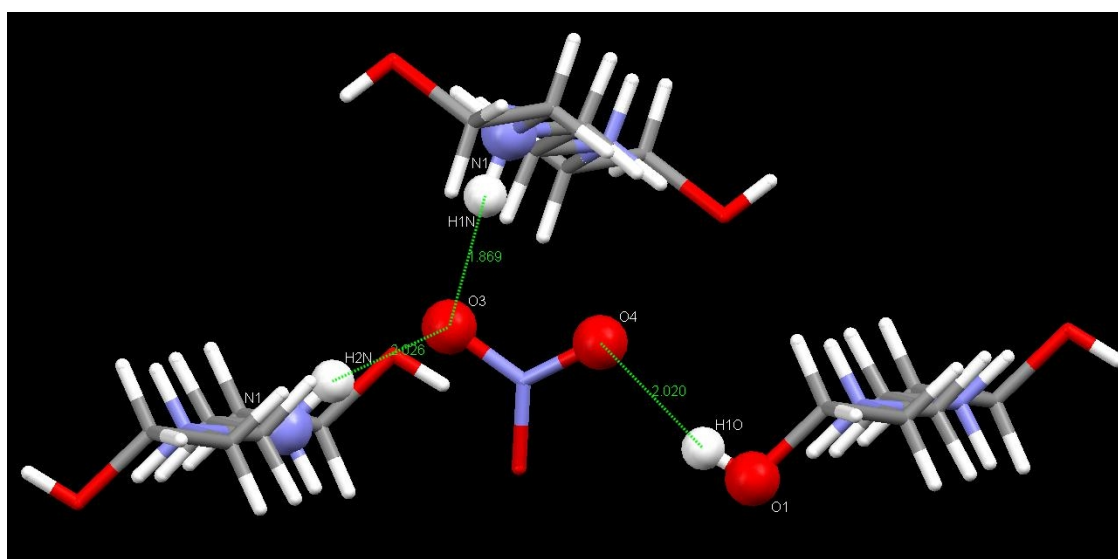

**Figure S5.** The H-bonding in the crystal structure of  $(\text{H}_2\text{BHEEN})(\text{NO}_3)_2$ .

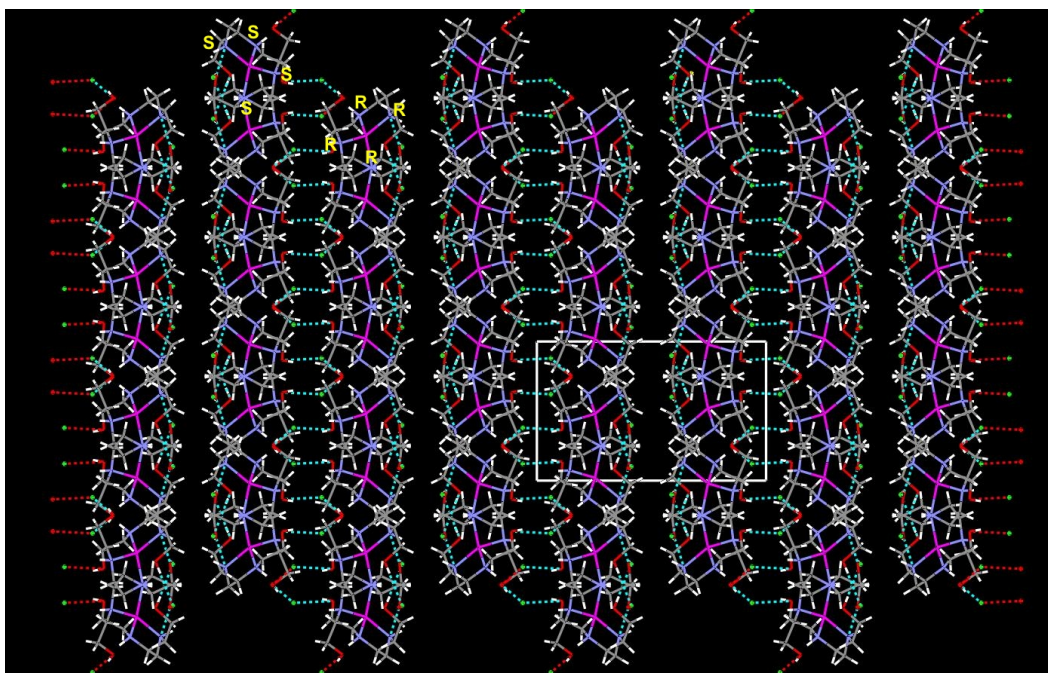

**Figure S6.** The packing of  $[\text{Zn}(\text{BHEEN})_2]\text{Cl}_2$  in alternating layers of bis-*trans*-*R,R* and the bis-*trans*-*S,S* isomers, viewed along the crystallographic *c* axis.

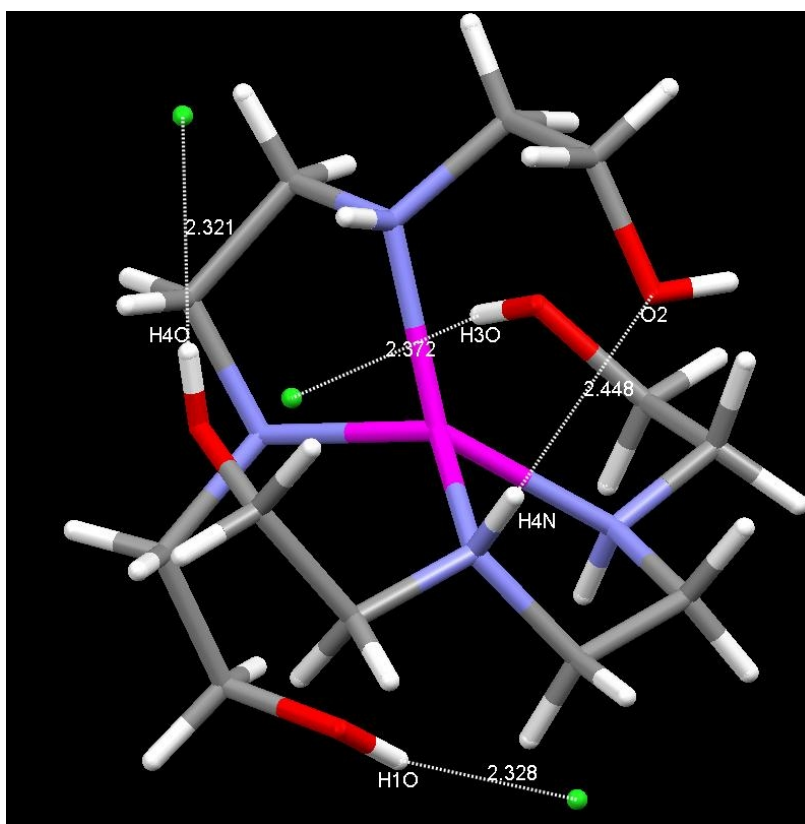

**Figure S7.** Hydrogen bonding in  $[\text{Zn}(\text{BHEEN})_2]\text{Cl}_2$

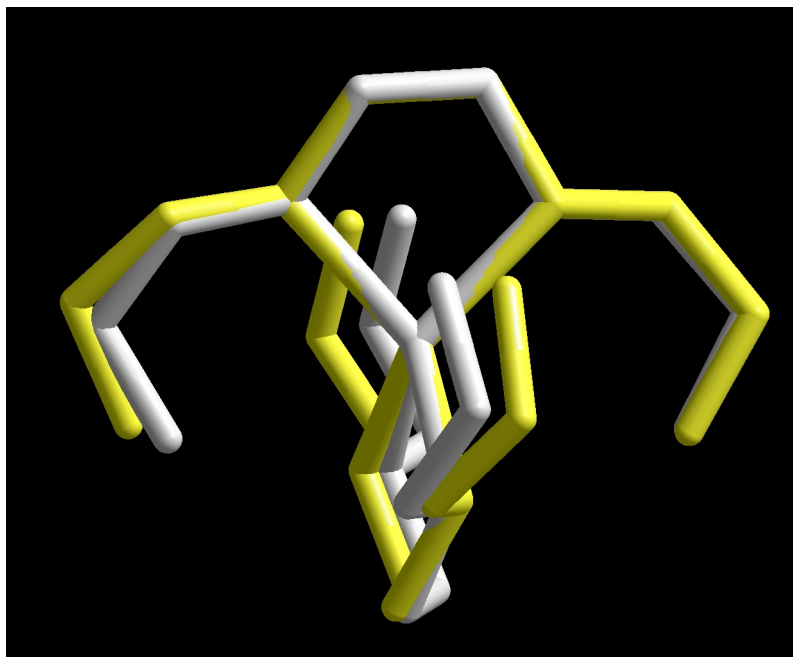

**Figure S8.** The crystal structure (white) and the DFT structure (yellow) of  $[\text{Zn}(\text{BHEEN})_2]^{2+}$  overlaid at the 5-membered chelate ring in the plane of the picture.

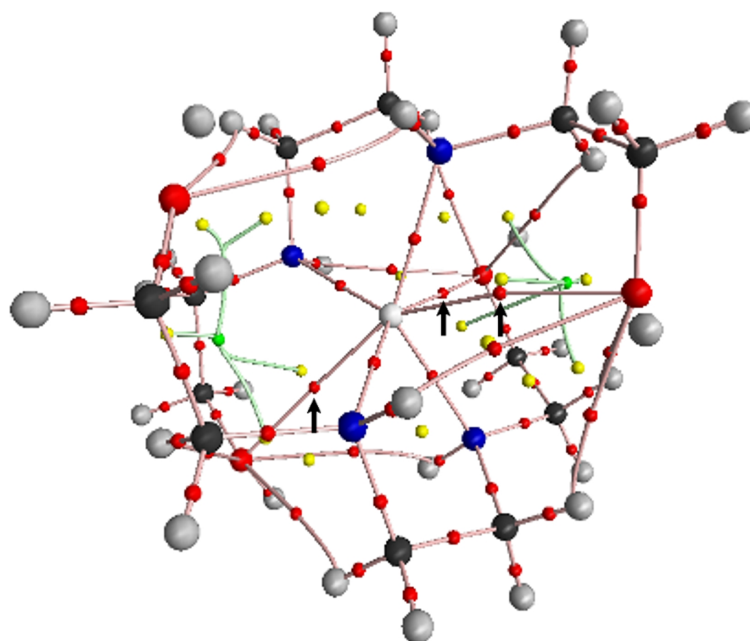

**Figure S9.** The molecular graph of  $[\text{Zn}(\text{BHEEN})_2]^{2+}$  at the crystal structure geometry analysed using AIM2000 from a wavefunction generated by a DFT calculation with the TZVP basis set on Zn, cc-pVTZ for all H atoms, and aug-cc-pVTZ for all other atoms. A bond path between Zn(II) and three of the O atoms of the pendent hydroxyethyl groups is observed (arrows indicate the bond critical points).

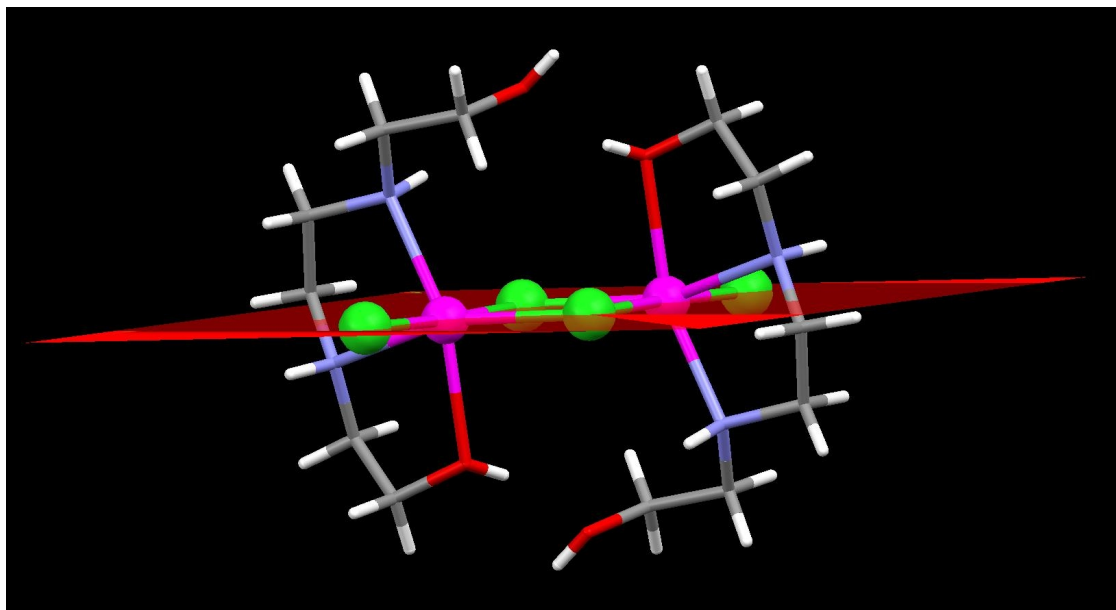

**Figure S10.** The four chloride ligands and the two metal ions in  $[(\mu\text{-Cl})_2(\text{Cd}(\text{BHEEN})\text{Cl})_2]$  are coplanar. A centre of inversion is located at the intersection of the vectors connecting the two Cd(II) ions and the two bridging chloride ligands, respectively.

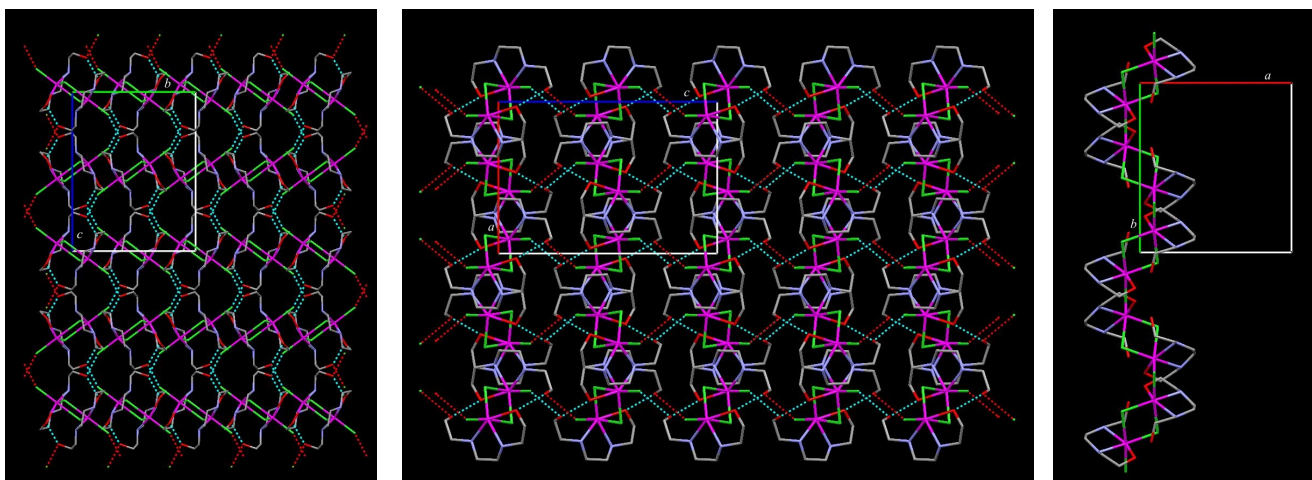

**Figure S11.** The packing of  $[(\mu\text{-Cl})_2(\text{Cd}(\text{BHEEN})\text{Cl})_2]$ . When viewed along the  $a$  and  $b$  crystallographic axes, the compound packs in a layered structure with layers connected by hydrogen bonding between a terminal  $\text{Cl}^-$  ligand and the uncoordinated OH group of a molecule in the neighbouring layer ( $\text{Cl}\cdots\text{O} = 2.411 \text{ \AA}$ ). A two-fold screw axis is evident along the  $c$  axis.

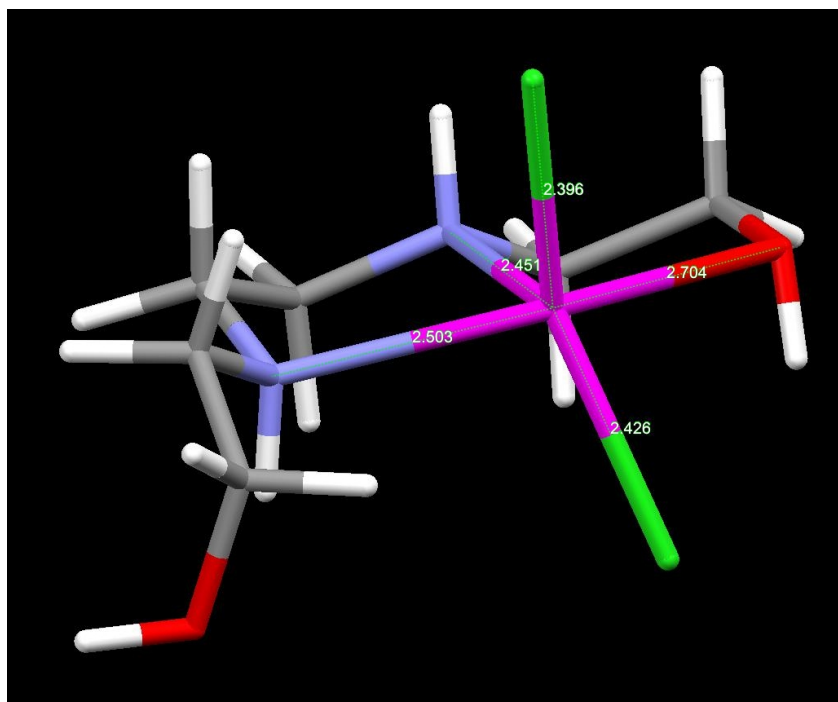

**Figure S12.** The DFT structure of the monomer, [Cd(BHEEN)Cl<sub>2</sub>]

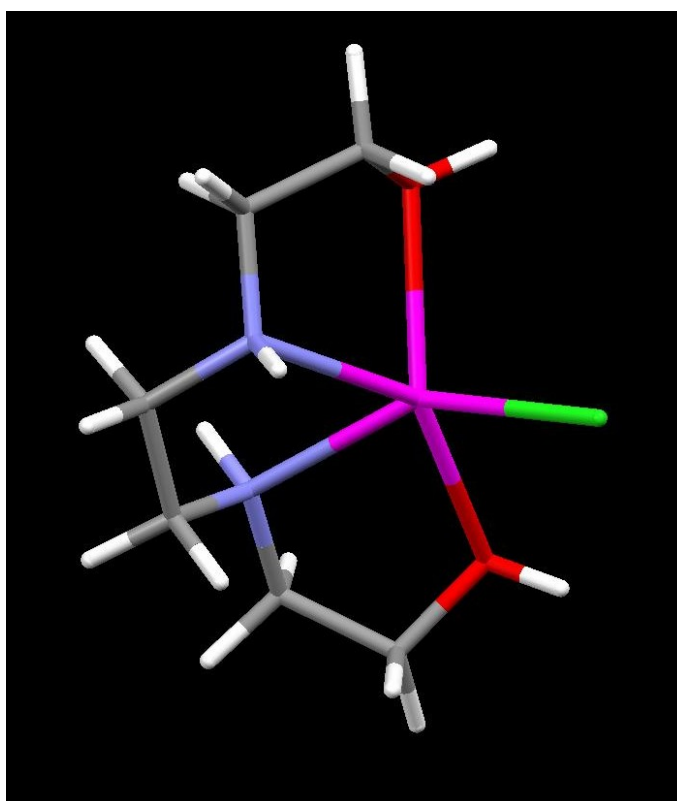

**Figure S13.** The DFT structure of [Cd(BHEEN)Cl]<sup>+</sup>



**Table S1.** Comparison of structural parameters in  $[\text{Zn}(\text{BHEEN})_2]^{2+}$  determined crystallographically and calculated using DFT at the B3LYP/TZVP/cc-pVTZ/aug-cc-pVTZ level of theory

| <b>Bond lengths</b> |     |                |       |          |
|---------------------|-----|----------------|-------|----------|
| X                   | Y   | Bond length /Å |       | Obs-Calc |
|                     |     | Obs            | Calc  |          |
| C1                  | C2  | 1.503          | 1.513 | -0.010   |
| C1                  | O1  | 1.423          | 1.439 | -0.016   |
| C10                 | C9  | 1.515          | 1.522 | -0.007   |
| C10                 | N4  | 1.481          | 1.489 | -0.008   |
| C11                 | C12 | 1.506          | 1.513 | -0.007   |
| C11                 | N4  | 1.481          | 1.488 | -0.007   |
| C12                 | O4  | 1.420          | 1.488 | -0.068   |
| C2                  | N1  | 1.482          | 1.522 | -0.040   |
| C3                  | C4  | 1.506          | 1.489 | 0.017    |
| C3                  | N1  | 1.486          | 1.488 | -0.002   |
| C4                  | N2  | 1.484          | 1.487 | -0.003   |
| C5                  | C6  | 1.498          | 1.513 | -0.015   |
| C5                  | N2  | 1.480          | 1.439 | 0.041    |
| C6                  | O2  | 1.420          | 1.439 | -0.019   |
| C7                  | C8  | 1.501          | 1.513 | -0.012   |
| C7                  | O3  | 1.421          | 1.439 | -0.018   |
| C8                  | N3  | 1.485          | 1.487 | -0.002   |
| C9                  | N3  | 1.484          | 1.488 | -0.004   |
| N1                  | Zn1 | 2.068          | 2.103 | -0.035   |
| N2                  | Zn1 | 2.058          | 2.092 | -0.034   |
| N3                  | Zn1 | 2.071          | 2.092 | -0.021   |
| N4                  | Zn1 | 2.072          | 2.103 | -0.031   |

*Average Deviation*

|             |                   |
|-------------|-------------------|
| <i>C-C</i>  | <i>-0.005(11)</i> |
| <i>C-N</i>  | <i>-0.003(22)</i> |
| <i>C-O</i>  | <i>-0.030(25)</i> |
| <i>Zn-N</i> | <i>-0.030(6)</i>  |

| <b>Bond Angles</b> |     |     |            |       |          |          |
|--------------------|-----|-----|------------|-------|----------|----------|
| X                  | Y   | Z   | Angle /deg |       | Obs-Calc | Obs-Calc |
|                    |     |     | Obs        | Calc  |          |          |
| C1                 | C2  | N1  | 110.8      | 112.9 | -2.1     | 2.1      |
| C10                | C9  | N3  | 109.8      | 110.7 | -0.8     | 0.8      |
| C10                | N4  | C11 | 110.2      | 112.0 | -1.7     | 1.7      |
| C10                | N4  | Zn1 | 106.0      | 104.3 | 1.7      | 1.7      |
| C11                | C12 | O4  | 109.0      | 110.0 | -1.0     | 1.0      |
| C11                | N4  | Zn1 | 119.6      | 122.2 | -2.6     | 2.6      |
| C12                | C11 | N4  | 110.9      | 112.9 | -2.0     | 2.0      |
| C2                 | C1  | O1  | 109.5      | 110.0 | -0.6     | 0.6      |
| C2                 | N1  | C3  | 110.9      | 112.0 | -1.1     | 1.1      |
| C2                 | N1  | Zn1 | 119.7      | 122.2 | -2.5     | 2.5      |

|    |     |     |       |       |      |     |
|----|-----|-----|-------|-------|------|-----|
| C3 | C4  | N2  | 108.9 | 110.7 | -1.8 | 1.8 |
| C3 | N1  | Zn1 | 106.2 | 104.3 | 1.9  | 1.9 |
| C4 | C3  | N1  | 110.8 | 110.6 | 0.2  | 0.2 |
| C4 | N2  | C5  | 112.5 | 112.1 | 0.3  | 0.3 |
| C4 | N2  | Zn1 | 106.4 | 105.0 | 1.4  | 1.4 |
| C5 | C6  | O2  | 111.1 | 109.8 | 1.3  | 1.3 |
| C5 | N2  | Zn1 | 118.9 | 121.1 | -2.2 | 2.2 |
| C6 | C5  | N2  | 109.1 | 112.4 | -3.3 | 3.3 |
| C7 | C8  | N3  | 110.5 | 112.4 | -2.0 | 2.0 |
| C8 | C7  | O3  | 108.9 | 109.7 | -0.9 | 0.9 |
| C8 | N3  | C9  | 111.3 | 112.1 | -0.9 | 0.9 |
| C8 | N3  | Zn1 | 120.2 | 121.1 | -0.9 | 0.9 |
| C9 | C10 | N4  | 110.5 | 110.6 | -0.1 | 0.1 |
| C9 | N3  | Zn1 | 106.1 | 105.0 | 1.1  | 1.1 |
| N1 | Zn1 | N2  | 85.8  | 86.7  | -0.9 | 0.9 |
| N3 | Zn1 | N4  | 86.1  | 86.7  | -0.6 | 0.6 |
| N1 | Zn1 | N3  | 114.8 | 112.5 | 2.3  | 2.3 |
| N2 | Zn1 | N4  | 117.6 | 112.5 | 5.1  | 5.1 |
| N3 | Zn1 | N2  | 131.1 | 134.2 | -3.1 | 3.1 |
| N1 | Zn1 | N4  | 126.9 | 130.7 | -3.8 | 3.8 |

*Average deviation*

*N-Zn-N*

**2.6(1.7)**

*C-N-Zn*

**1.8(6)**

*All other angles*

**1.3(9)**

---

**Table S2.** Thermochemical data from DFT energy-minimised structures of Cd(II) and BHEEN. All values in Hartrees,  $T = 298.15$  K,  $P = 1$  atm.

|                                                                            | [Cd(BHEEN)Cl <sub>2</sub> ]                                                   | [Cd(BHEEN)Cl] <sup>+</sup> | Cl <sup>-</sup> |
|----------------------------------------------------------------------------|-------------------------------------------------------------------------------|----------------------------|-----------------|
| Zero point correction                                                      | ZPE                                                                           | 0.238671                   | 0.239475        |
| Correction to internal energy                                              | $E_{\text{corr}} = E_{\text{t}} + E_{\text{r}} + E_{\text{v}} + E_{\text{e}}$ | 0.256530                   | 0.25473         |
| Thermal correction to enthalpy                                             | $H_{\text{corr}} = E_{\text{tot}} + k_{\text{B}}T$                            | 0.257474                   | 0.255674        |
| Thermal correction to Gibbs energy                                         | $G_{\text{corr}} = H_{\text{corr}} - TS_{\text{tot}}$                         | 0.189676                   | 0.194742        |
| Total Electronic energy                                                    | $E_0$                                                                         | -1586.791496               | -1126.28851     |
| Sum of electronic and zero point energies                                  | $E' = E_0 + ZPE$                                                              | -1586.552825               | -1126.049032    |
| Sum of electronic and thermal energies                                     | $E = E_0 + E_{\text{corr}}$                                                   | -1586.534966               | -1126.033777    |
| Sum of electronic and thermal enthalpies                                   | $H = E_0 + H_{\text{corr}}$                                                   | -1586.534022               | -1126.032832    |
| Sum of electronic and thermal Gibbs energies                               | $G = E_0 + G_{\text{corr}}$                                                   | -1586.601820               | -1126.093765    |
| <i>Excluding low frequency vibrational modes (&lt;625 cm<sup>-1</sup>)</i> |                                                                               |                            |                 |
| Zero point correction                                                      | ZPE                                                                           | 0.238671                   | 0.239475        |
| Correction to internal energy                                              | $E_{\text{corr}} = E_{\text{t}} + E_{\text{r}} + E_{\text{v}} + E_{\text{e}}$ | 0.227734                   | 0.229033983     |
| Thermal correction to enthalpy                                             | $H_{\text{corr}} = E_{\text{tot}} + k_{\text{B}}T$                            | 0.228678                   | 0.229978229     |
| Thermal correction to Gibbs energy                                         | $G_{\text{corr}} = H_{\text{corr}} - TS_{\text{tot}}$                         | 0.191561                   | 0.193320825     |
| Total Electronic energy                                                    | $E_0$                                                                         | -1586.791496               | -1126.28851     |
| Sum of electronic and zero point energies                                  | $E' = E_0 + ZPE$                                                              | -1586.552825               | -1126.049032    |
| Sum of electronic and thermal energies                                     | $E = E_0 + E_{\text{corr}}$                                                   | -1586.563762               | -1126.059473    |
| Sum of electronic and thermal enthalpies                                   | $H = E_0 + H_{\text{corr}}$                                                   | -1586.562818               | -1126.058529    |
| Sum of electronic and thermal Gibbs energies                               | $G = E_0 + G_{\text{corr}}$                                                   | -1586.599935               | -1126.095186    |
